# Supplementary material for: Assessment of an Ultrasound-Guided Rectus Sheath Block in Foals: A Cadaveric Study
Source: Preprints.org preprint supplement (doi:10.20944/preprints202310.0586.v1), 2023-10-10

SUPLEMENTARY MATERIAL:

**Picture 1:** Image showing the position of the ultrasound probe at the cranial right injection point. The foal was position in dorsal recumbency, and the needle was inserted in a medio-lateral direction with an in plane technique.


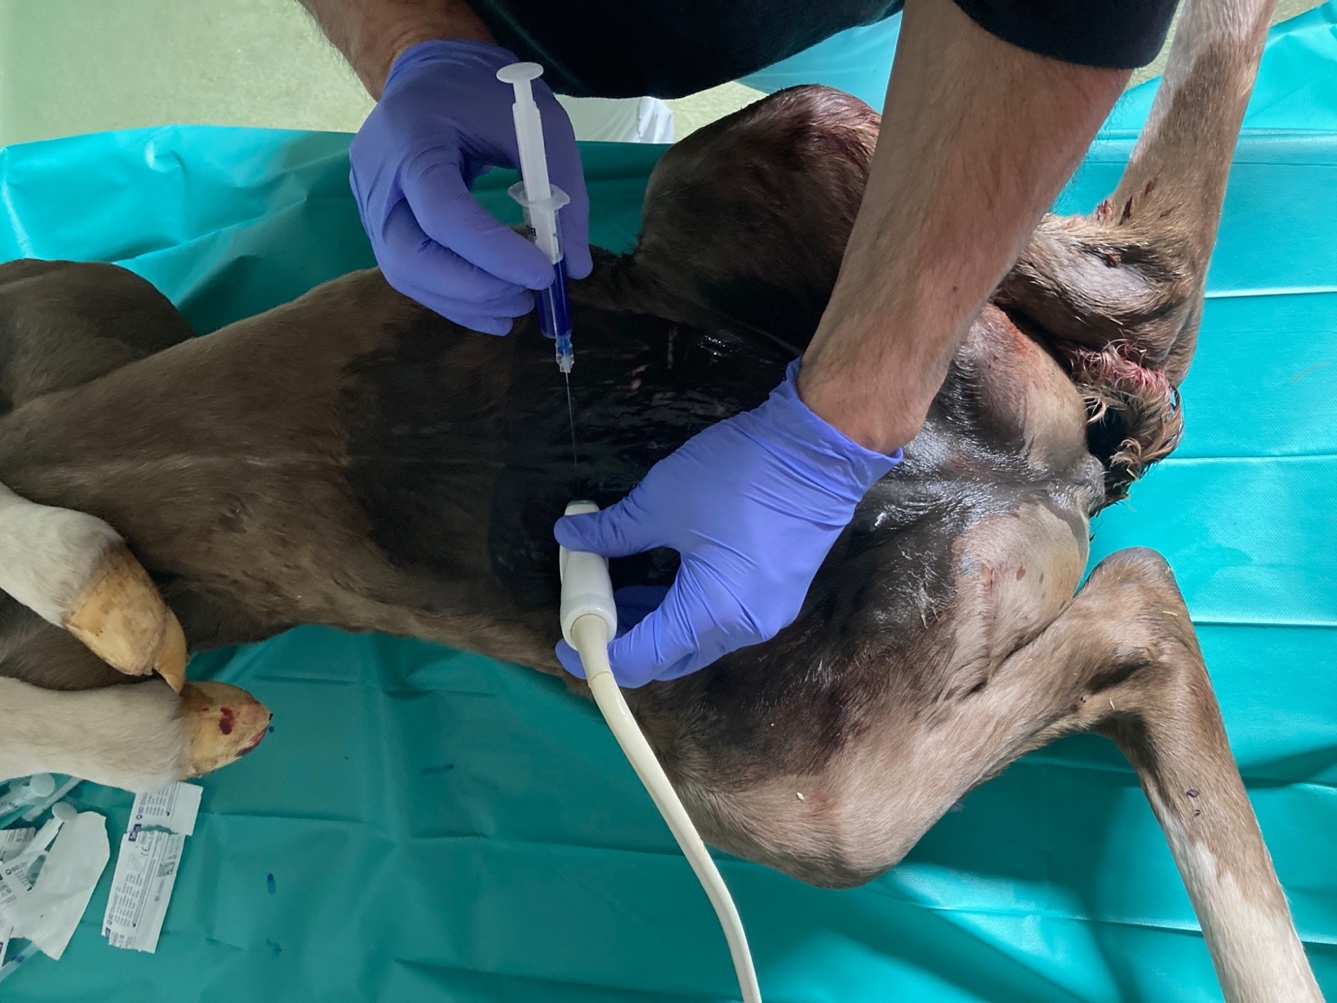


**Picture 2:** Image showing the needle as it passed through the *rectus abdomini*s muscle and created a pocket by hydro dissection between this muscle and the aponeurosis of the *transversus abdomini*s muscle and peritoneum (double line).


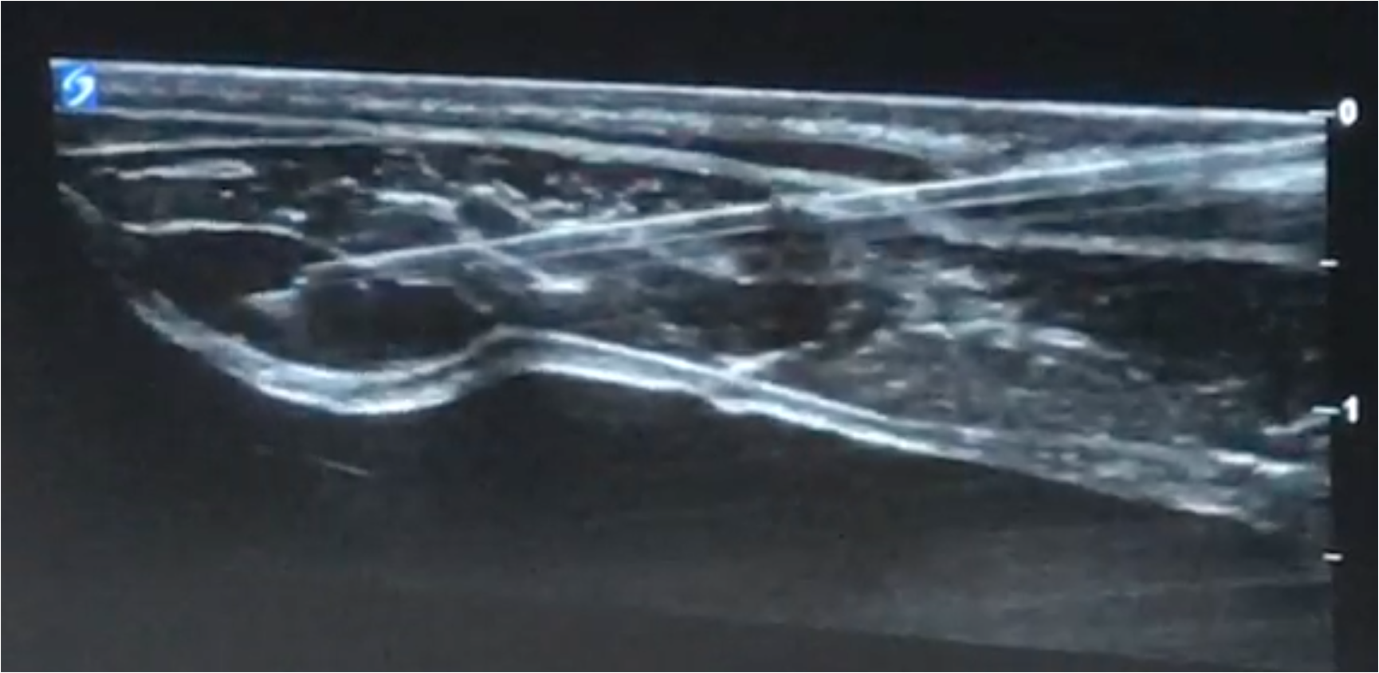


**Picture 3:** Image showing the dissection of the abdominal wall of a foal. The ventral branches of the spinal nerves are identified, running over the surface of the *transversus abdomini*s muscle and piercing the *rectus abdominis* muscle in the most ventral aspect.


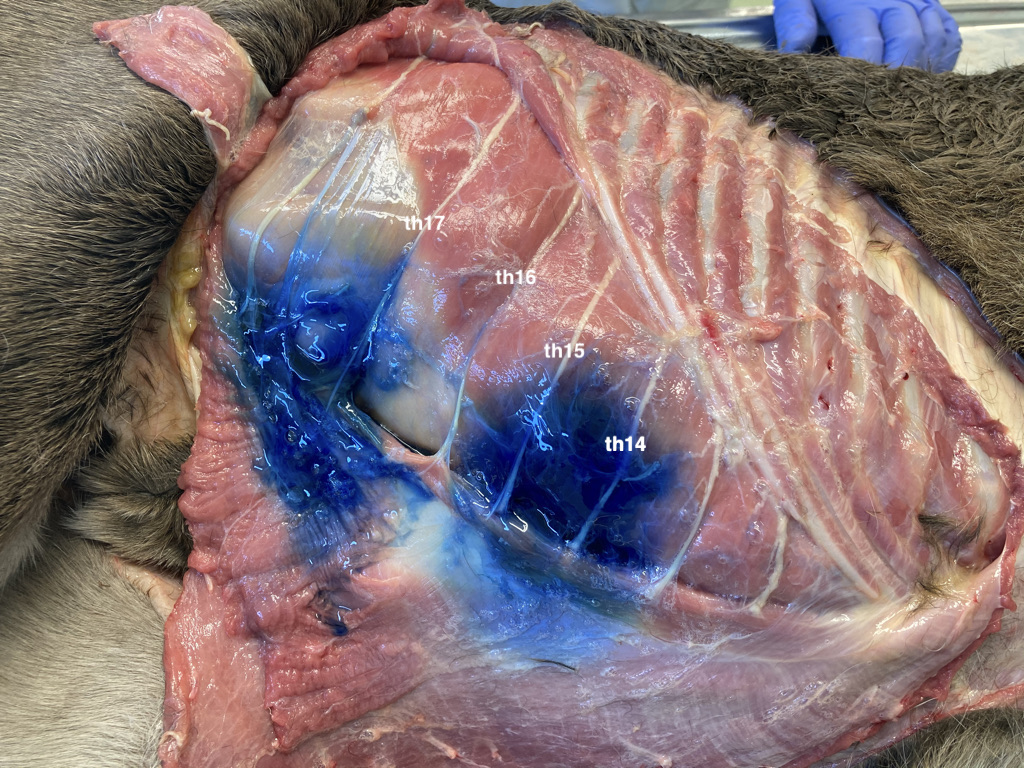

Supplement: Supplementary file 1 [file supplementary]
